# Supplementary material for: Determination of eight fungicides in tanned leather by liquid chromatography with mass spectrometry and with diode array spectrophotometric detection
Source: Royal Society of Chemistry journal article supplement (doi:10.1039/d4ay02152e), 2025-01-01
Supplement: d4ay02152e1.pdf [file d4ay02152e1.pdf]

## ELECTRONIC SUPPLEMENTARY MATERIAL

### **Determination of eight fungicides in tanned leather by liquid chromatography with mass spectrometry and with diode array spectrophotometric detection**

Francisco Javier Acevedo-Aguilar<sup>§</sup>, Israel Enciso Donis<sup>§</sup>, Kazimierz Wrobel, Alma Rosa Corrales Escobosa, Luis Mario Magaña Maldonado and Katarzyna Wrobel\*

Chemistry Department, Division of Natural and Exact Sciences, University of Guanajuato, L. de Retana 5, 36000 Guanajuato, Mexico

<sup>§</sup> Both authors contributed equally to this work

\* Corresponding author. E-mail address: [katarzyn@ugto.mx](mailto:katarzyn@ugto.mx) (Katarzyna Wrobel)

**Fig. 1S.** Typical HPLC-DAD chromatograms obtained for (a) mixed standard solution containing BNPD, PCMC, OPP, PRO 16 mg L<sup>-1</sup> each; CBZ 5.0 mg L<sup>-1</sup>; TCMTB, OIT 8.0 mg L<sup>-1</sup> each and IS 5.0 mg L<sup>-1</sup> and for the extract of sample 11 without standard addition and after three-point standard addition (details given in section 2.4): (b) analytical wavelength 220 nm, (c) 287 nm and (d) 330 nm.

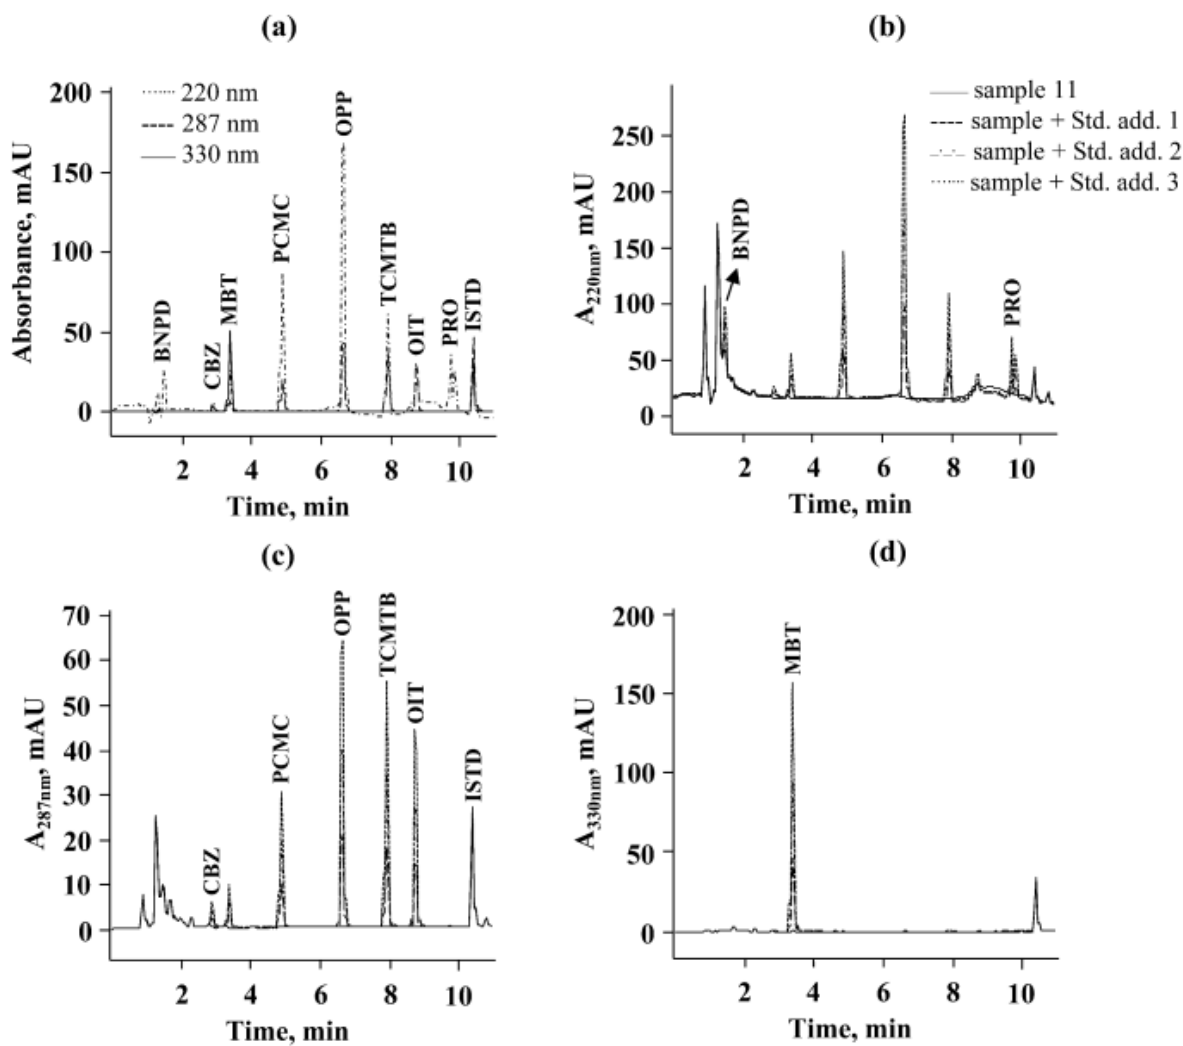

**Table 1S.** Analytical results obtained for ten random leather samples using two proposed procedures: HPLC-ESI-ITMS and HPLC-DAD. Mean values with respective standard deviations are presented based on three replicates.

| sample        | Fungicide concentration, mean value $\pm$ SD, $\mu\text{g g}^{-1}$ (n=3) |                |                |                |                |                 |
|---------------|--------------------------------------------------------------------------|----------------|----------------|----------------|----------------|-----------------|
|               | CBZ                                                                      | MBT            | PCMC           | OPP            | TCMTB          | OIT             |
| HPLC-ESI-ITMS |                                                                          |                |                |                |                |                 |
| 1             | 146 $\pm$ 3                                                              | < LOQ           |
| 2             | < LOQ                                                                    | 20.2 $\pm$ 1.9 | < LOQ          | < LOQ          | 75.6 $\pm$ 1.8 | 225 $\pm$ 2     |
| 3             | < LOQ                                                                    | < LOQ          | < LOQ          | < LOQ          | < LOQ          | 526 $\pm$ 8     |
| 4             | < LOQ                                                                    | < LOQ          | 24.5 $\pm$ 1.3 | 13.6 $\pm$ 1.2 | < LOQ          | 202 $\pm$ 3     |
| 5             | < LOQ                                                                    | 21.6 $\pm$ 2.2 | 63.9 $\pm$ 1.2 | 22.7 $\pm$ 1.1 | 114 $\pm$ 2    | < LOQ           |
| 6             | < LOQ                                                                    | < LOQ          | 120 $\pm$ 1    | 126 $\pm$ 2    | < LOQ          | 14.9 $\pm$ 0.9  |
| 7             | < LOQ                                                                    | < LOQ          | 38.6 $\pm$ 1.0 | < LOQ          | 41.3 $\pm$ 1.8 | 385 $\pm$ 4     |
| 8             | 103 $\pm$ 2                                                              | < LOQ          | < LOQ          | < LOQ          | < LOQ          | 34.0 $\pm$ 1.6  |
| 9             | < LOQ                                                                    | 26.8 $\pm$ 0.9 | < LOQ          | < LOQ          | 476 $\pm$ 6    | 131 $\pm$ 2     |
| 10            | 42.8 $\pm$ 1.3                                                           | 52.4 $\pm$ 1.2 | < LOQ          | < LOQ          | 12.6 $\pm$ 1.1 | 6.15 $\pm$ 1.1  |
| HPLC-DAD      |                                                                          |                |                |                |                |                 |
| 1             | 164 $\pm$ 3                                                              | < LOQ           |
| 2             | < LOQ                                                                    | 26.0 $\pm$ 0.6 | < LOQ          | < LOQ          | 78.9 $\pm$ 1.6 | 205 $\pm$ 3     |
| 3             | < LOQ                                                                    | < LOQ          | < LOQ          | < LOQ          | < LOQ          | 497 $\pm$ 7     |
| 4             | < LOQ                                                                    | < LOQ          | 32.6 $\pm$ 0.2 | 18.3 $\pm$ 0.3 | < LOQ          | 178 $\pm$ 2     |
| 5             | < LOQ                                                                    | 21.9 $\pm$ 0.5 | 65.6 $\pm$ 0.6 | 39.0 $\pm$ 0.9 | 140 $\pm$ 0.1  | < LOQ           |
| 6             | < LOQ                                                                    | < LOQ          | 132 $\pm$ 2    | 124 $\pm$ 2    | < LOQ          | 15.5 $\pm$ 0.5  |
| 7             | < LOQ                                                                    | < LOQ          | 41.7 $\pm$ 0.6 | < LOQ          | 49.4 $\pm$ 1.1 | 337 $\pm$ 7     |
| 8             | 108 $\pm$ 2                                                              | < LOQ          | < LOQ          | < LOQ          | < LOQ          | 29.3 $\pm$ 1.0  |
| 9             | < LOQ                                                                    | 29.3 $\pm$ 0.6 | < LOQ          | < LOQ          | 453 $\pm$ 7    | 113 $\pm$ 4     |
| 10            | 52.1 $\pm$ 0.5                                                           | 40.6 $\pm$ 0.5 | < LOQ          | < LOQ          | 10.5 $\pm$ 0.2 | 7.72 $\pm$ 0.12 |
